# Supplementary material for: Development of high affinity broadly reactive aptamers for spike protein of multiple SARS-CoV-2 variants
Source: Royal Society of Chemistry journal article supplement (doi:10.1039/d3ra01382k), 2023-01-01
Supplement: d3ra01382k1.pdf [file d3ra01382k1.pdf]

## Supplementary Information

# Development of High Affinity Broadly Reactive Aptamers for Spike Protein of Multiple SARS-CoV-2 Variants

Thao T. Le, Donald J. Benton, Antoni G. Wrobel and Steven J. Gamblin

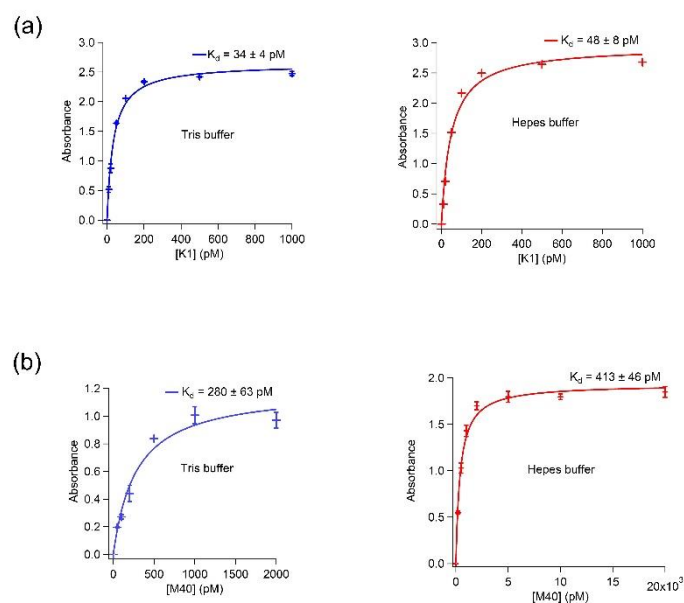

**Figure S11:** (a) Binding of aptamer K1 in Tris buffer and Hepes buffer. (b) Binding of aptamer M40 in Tris buffer and Hepes buffer.

(a)

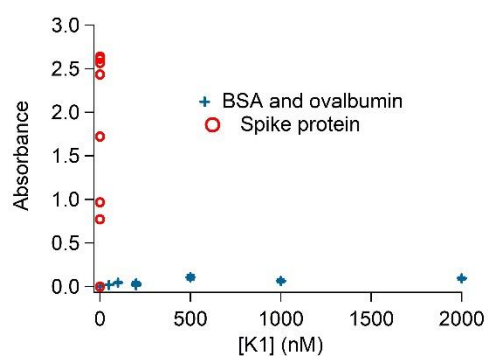

(b)

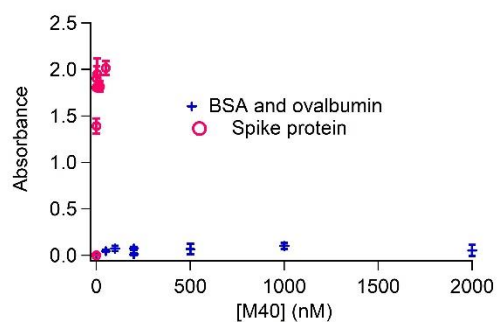

**Figure S12:** Control experiments. (a) Binding of aptamer K1 to BSA and ovalbumin. (b) Binding of aptamer M40 to BSA and ovalbumin.

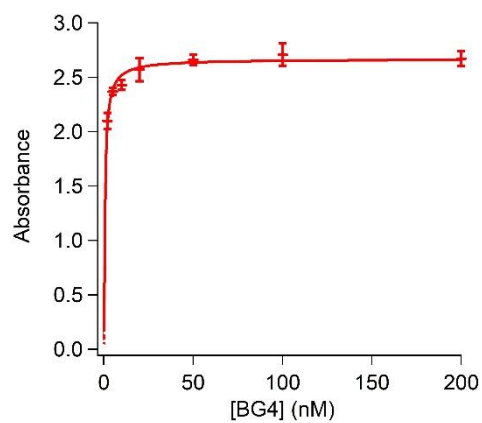

**Figure S13:** Binding of BG4 to biotinylated aptamer K1 (immobilised on plate) by ELISA. Aptamer K1 had a biotin tag at its 3'-end to facilitate its immobilisation on the streptavidin-coated microtiter plate.

(a)

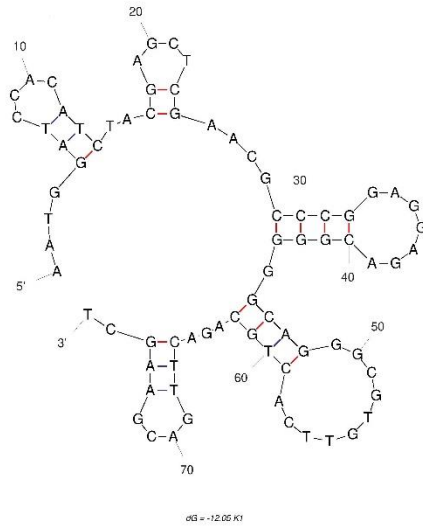

(b)

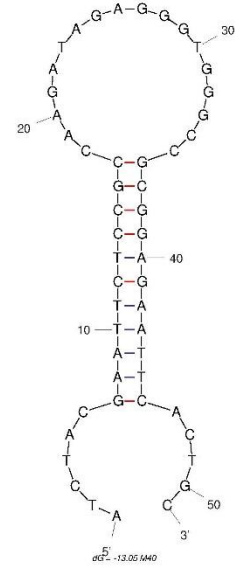

**Figure S14:** Predicted secondary structures of the aptamers using MFold<sup>1</sup> at in solution having 150 mM Na<sup>+</sup> and 5 mM Mg<sup>2+</sup> and 25°C. (a) Predicted structure of aptamer K1. (b) Predicted structure of aptamer M40.

**Table S11:** A predicted G-quadruplex of aptamer K1 with its overlaps by QSGR-Mapper<sup>2</sup>

| Predicted structure Sample | Position | Length | QGRS                                | G-Score |
|----------------------------|----------|--------|-------------------------------------|---------|
| P1                         | 32       | 13     | <a href="#">GGAGGAGACGGGG</a>       | 17      |
| P2                         | 32       | 14     | <a href="#">GGAGGAGACGGGGG</a>      | 18      |
| P3                         | 32       | 14     | <a href="#">GGAGGAGACGGGGG</a>      | 16      |
| P4                         | 32       | 18     | <a href="#">GGAGGAGACGGGGGCAGG</a>  | 17      |
| P5                         | 32       | 18     | <a href="#">GGAGGAGACGGGGGCAGG</a>  | 17      |
| P6                         | 32       | 18     | <a href="#">GGAGGAGACGGGGGCAGG</a>  | 16      |
| P7                         | 32       | 18     | <a href="#">GGAGGAGACGGGGGCAGG</a>  | 15      |
| P8                         | 32       | 18     | <a href="#">GGAGGAGACGGGGGCAGG</a>  | 14      |
| P9                         | 32       | 18     | <a href="#">GAGGAGACGGGGGCAGG</a>   | 15      |
| P10                        | 32       | 18     | <a href="#">GGAGGAGACGGGGGCAGG</a>  | 13      |
| P11                        | 32       | 19     | <a href="#">GGAGGAGACGGGGGCAGGG</a> | 16      |
| P12                        | 32       | 19     | <a href="#">GGAGGAGACGGGGGCAGGG</a> | 17      |
| P13                        | 32       | 19     | <a href="#">GGAGGAGACGGGGGCAGGG</a> | 16      |
| P14                        | 32       | 19     | <a href="#">GGAGGAGACGGGGGCAGGG</a> | 15      |
| P15                        | 32       | 19     | <a href="#">GGAGGAGACGGGGGCAGGG</a> | 14      |
| P16                        | 32       | 19     | <a href="#">GGAGGAGACGGGGGCAGGG</a> | 15      |
| P17                        | 32       | 19     | <a href="#">GGAGGAGACGGGGGCAGGG</a> | 13      |
| P18                        | 35       | 15     | <a href="#">GGAGACGGGGGCAGG</a>     | 17      |
| P19                        | 35       | 15     | <a href="#">GGAGACGGGGGCAGG</a>     | 18      |
| P20                        | 35       | 15     | <a href="#">GGAGACGGGGGCAGG</a>     | 16      |
| P21                        | 35       | 16     | <a href="#">GGAGACGGGGGCAGGG</a>    | 17      |
| P22                        | 35       | 16     | <a href="#">GGAGACGGGGGCAGGG</a>    | 18      |
| P23                        | 35       | 16     | <a href="#">GAGACGGGGGCAGGG</a>     | 16      |

**Table S12:** Sequences of the truncated oligos

|                |                                                                   |
|----------------|-------------------------------------------------------------------|
| <b>Oligo14</b> | CCACATCTACGA GCTCGAACGCCCGGAGGAGACGGGGGCAGGGCGTG TTCACTGCAGACTTGA |
| <b>Oligo30</b> | ACGA GCTCGAACGCCCGGAGGAGACGGGGGCAGGGCGTG TTCACTGC                 |

## References

- 1 M. Zuker, Nucleic Acids Research, 2003. **31**(13): p. 3406-3415.
- 2 O. Kikin, L. D'Antonio, and P. S. Bagga, Nucleic Acids Research, 2006. **34**(suppl\_2): p. W676-W682.
